# Supplementary material
Source: HighWire-hosted journal article supplement (https://erj.ersjournals.com/content/57/1/2002682)
Supplement: inline-supplementary-material-1 [file inline-supplementary-material-1.pdf]

# Validation of Lung EpiCheck®, a novel methylation-based blood assay, for the detection of lung cancer in European and Chinese high-risk individuals

## SUPPLEMENTARY MATERIALS

### Supplemental Figure S1. Marker panel and algorithm development

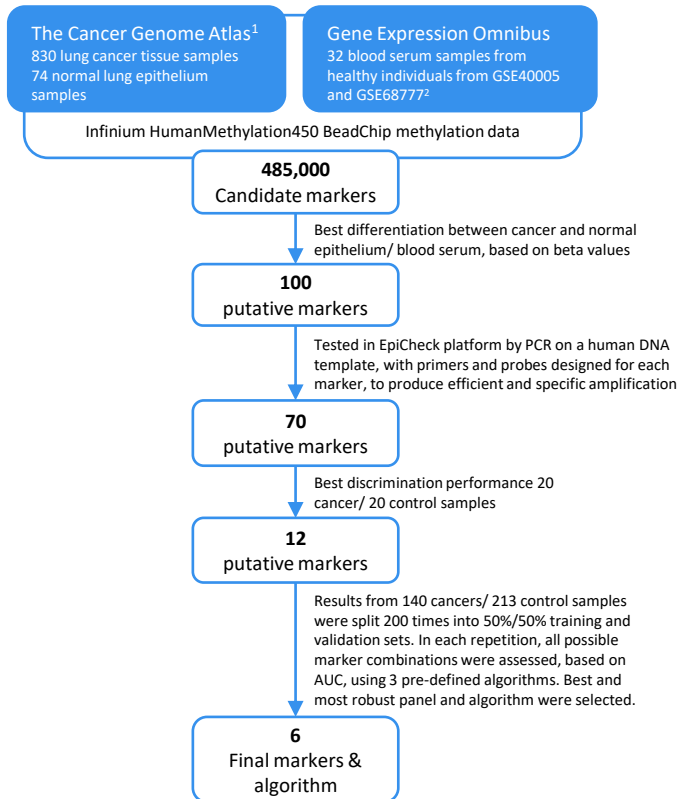

<sup>1</sup> Weisenberger. Characterizing DNA methylation alterations from The Cancer Genome Atlas. *J Clin Investig* 2014;124:17-23  
<sup>2</sup> Sabuncuyan et al. Association of DNA Methylation with Acute Mania and Inflammatory Markers. *PLoS One* 2015;10(7):e0132001

Supplemental Table S2. List of sites, European sets

|    |                                                                                |
|----|--------------------------------------------------------------------------------|
| 1  | Athens Chest Hospital Sotiria, Athens, Greece                                  |
| 2  | BioIVT (Seralab) LLC.                                                          |
| 3  | Carmel Medical Center, Haifa, Israel                                           |
| 4  | Emek Medical Center, Afula, Israel                                             |
| 5  | Holy Family Hospital, Nazareth, Israel                                         |
| 6  | Indivumed GmbH                                                                 |
| 7  | Maccabi Petach Tikva Clinic, Maccabi Health services, Petach Tikva, Israel     |
| 8  | Maccabi Ramat Hasharon Clinic, Maccabi Health services, Ramat Hasharon, Israel |
| 9  | Meir Medical Center, Kfar Saba, Israel                                         |
| 10 | National Institute of Tuberculosis and Lung Diseases, Warsaw, Poland           |
| 11 | National Korányi Institute of Pulmonology, Budapest, Hungary                   |
| 12 | Shaare Zedek Medical Center, Jerusalem, Israel                                 |
| 13 | Shamir Medical Center (Assaf Harofeh), Zrifin, Israel                          |
| 14 | Shuali Ra'anana Clinic, Clalit Health Services, Ra'anana, Israel               |
| 15 | Soroka Medical Center, Beer Sheva, Israel                                      |
| 16 | Tel-Aviv Sourasky Medical Center (Ichilov), Tel-Aviv, Israel                   |
| 17 | Tissue solutions Ltd.                                                          |
| 18 | Wolfson Medical Center, Holon, Israel                                          |
| 19 | Ziekenhuisgroep Twente (ZGT), Hengelo, the Netherlands                         |
| 20 | Ziv Medical Center, Safed, Israel                                              |

Supplemental Figure S3. CONSORT diagrams

S3a. CONSORT diagram European validation set

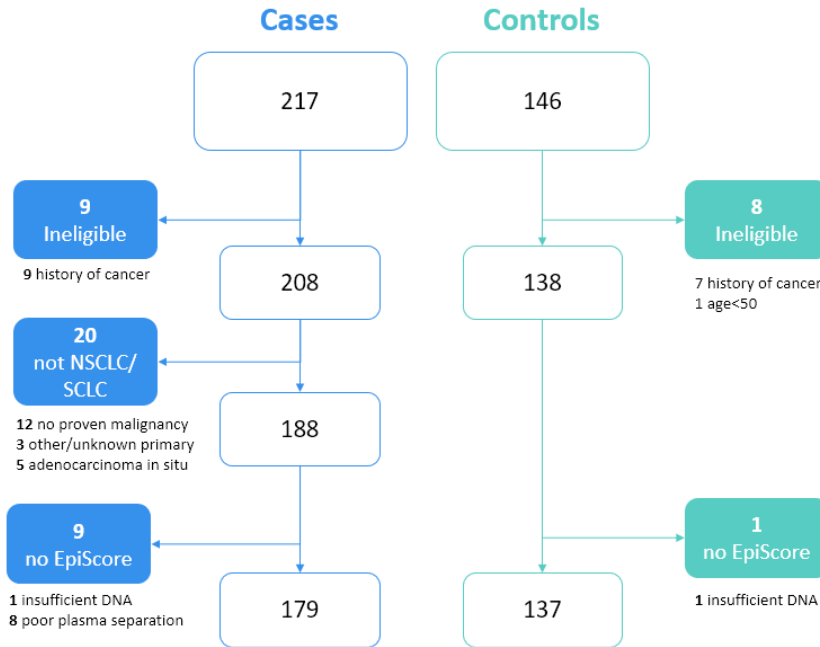

S3.b. CONSORT diagram Chinese validation set

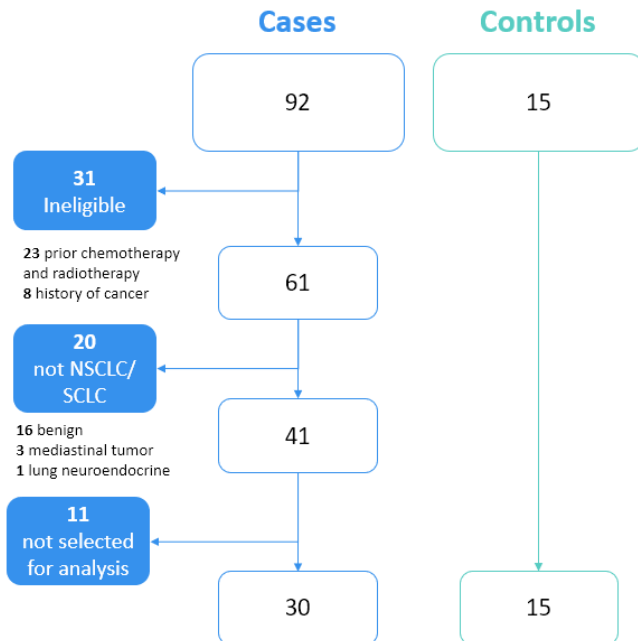

Supplemental Figure S4. ROC curves by extent of disease

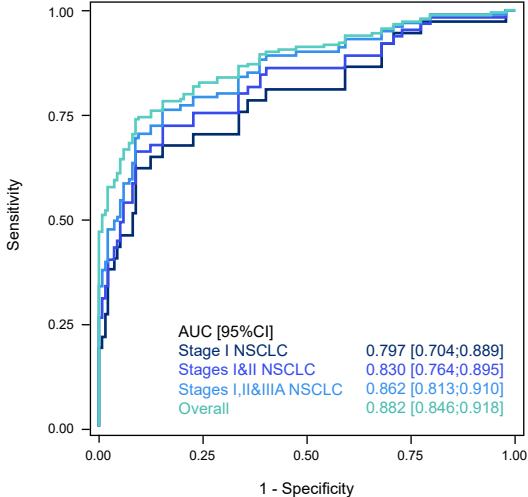

Supplemental Table S5. Lung EpiCheck performance by likelihood ratio

|                                                                                       | Training Set               |                             | European Validation Set    |                             | Chinese Validation Set     |                             |
|---------------------------------------------------------------------------------------|----------------------------|-----------------------------|----------------------------|-----------------------------|----------------------------|-----------------------------|
|                                                                                       | Low cut-off<br>EpiScore=60 | High cut-off<br>EpiScore=70 | Low cut-off<br>EpiScore=60 | High cut-off<br>EpiScore=70 | Low cut-off<br>EpiScore=60 | High cut-off<br>EpiScore=70 |
| <b>Positive Likelihood Ratio [95% CI]</b>                                             | 3.8 [3.0;4.8]              | 11.5 [7.1;18.4]             | 2.4 [1.9;3.1]              | 7.8 [4.6;13.2]              | 11.5 [1.7;77.2]            | 18.1 [1.2;281.4]            |
| <b>Negative Likelihood Ratio [95% CI]</b>                                             | 0.2 [0.1;0.3]              | 0.3 [0.2;0.4]               | 0.2 [0.1;0.3]              | 0.3 [0.2;0.4]               | 0.2 [0.1;0.5]              | 0.4 [0.3;0.7]               |
| <b>Positive Likelihood Ratio by histological subtype [95% CI]</b>                     |                            |                             |                            |                             |                            |                             |
| Adenocarcinoma                                                                        | 3.4 [2.6;4.5]              | 9.4 [5.6;15.7]              | 2.5 [2.0;3.2]              | 7.6 [4.4;12.9]              | 9.5 [1.4;64.9]             | 10.4 [0.6;171.1]            |
| Squamous Cell Carcinoma                                                               | 4.1 [3.2;5.3]              | 13.1 [8.1;21.2]             | 2.3 [1.8;3.0]              | 7.5 [4.4;12.9]              | 15.0 [2.3;99.6]            | 30.7 [2.0;470.6]*           |
| Other NSCLC                                                                           | 3.0 [1.3;6.9]              | 10.4 [4.1;26.2]             | 2.3 [1.5;3.6]              | 8.8 [4.7;16.5]              |                            |                             |
| All NSCLC                                                                             | 3.7 [2.9;4.7]              | 11.1 [6.8;17.9]             | 2.4 [1.9;3.0]              | 7.6 [4.5;12.9]              | 11.5 [1.7;77.2]            | 18.1 [1.2;281.4]            |
| Small cell carcinoma                                                                  | 4.5 [3.6;5.6]              | 14.0 [8.5;23.2]             | 2.8 [2.2;3.5]              | 9.8 [5.8;16.8]              |                            |                             |
| Other/ Unknown                                                                        | 3.7 [2.5;5.7]              | 13.0 [7.3;23.3]             | 2.8 [2.2;3.5]              | 10.5 [6.3;17.7]             |                            |                             |
| <b>Positive Likelihood Ratio by NSCLC stage</b>                                       |                            |                             |                            |                             |                            |                             |
| I                                                                                     | 3.1 [2.2;4.4]              | 7.8 [4.3;14.2]              | 2.2 [1.7;2.9]              | 6.6 [3.7;11.6]              | 10.5 [1.5;72.8]            | 10.2 [0.6;178.2]            |
| II                                                                                    | 3.6 [2.7;4.9]              | 10.4 [6.0;18.0]             | 2.4 [1.8;3.1]              | 7.5 [4.3;13.3]              | 7.5 [1.0;58.6]             | 11.4 [0.6;208.5]            |
| III                                                                                   | 3.8 [2.9;5.1]              | 12.5 [7.5;20.8]             | 2.5 [2.0;3.2]              | 7.9 [4.6;13.5]              | 13.6 [2.0;91.4]            | 28.0 [1.8;432.2]            |
| IV                                                                                    | 4.5 [3.6;5.6]              | 14.7 [9.1;23.6]             | 2.5 [1.9;3.2]              | 8.5 [5.0;14.7]              | 15.0 [2.3;99.6]            | 20.0 [1.2;339.5]            |
| Unstaged                                                                              | 4.5 [3.6;5.6]              | 15.6 [9.8;24.7]             | 0.7 [0.1;7.8]              | 2.6 [0.2;30.7]              |                            |                             |
| <b>Positive Likelihood Ratio by tumor size (largest diameter), NSCLC only</b>         |                            |                             |                            |                             |                            |                             |
| ≤20                                                                                   | 1.8 [0.8;4.0]              | 4.7 [1.6;13.4]              | 1.9 [1.3;2.9]              | 4.6 [2.2;9.8]               | 9.0 [1.2;68.1]             | 8.0 [0.4;170.6]             |
| 21-30                                                                                 | 3.1 [2.0;4.8]              | 7.2 [3.4;15.2]              | 1.8 [1.2;2.6]              | 4.8 [2.4;9.6]               | 10.0 [1.4;72.2]            | 11.4 [0.6;208.5]            |
| 31-50                                                                                 | 3.9 [3.0;5.2]              | 12.3 [7.5;20.4]             | 2.6 [2.1;3.3]              | 8.2 [4.8;14.0]              | 11.8 [1.7;79.8]            | 20.3 [1.3;318.7]            |
| >50                                                                                   | 4.5 [3.6;5.6]              | 15.6 [9.8;24.7]             | 2.6 [2.1;3.3]              | 9.3 [5.5;15.7]              | 15.0 [2.3;99.6]            | 29.3 [1.9;453.8]*           |
| Unknown                                                                               | 4.1 [3.2;5.2]              | 12.1 [7.3;19.8]             | 2.4 [1.8;3.1]              | 7.8 [4.4;13.7]              |                            |                             |
| <b>Positive Likelihood Ratio by tumor size (largest diameter), stage I NSCLC only</b> |                            |                             |                            |                             |                            |                             |
| ≤20                                                                                   | 0.6 [0.1;4.0]              | 1.0 [0.1;14.8]              | 1.6 [0.8;3.2]              | 4.5 [1.7;12.3]              | 7.5 [0.9;63.2]             | 3.2 [0.1;141.5]**           |
| 21-30                                                                                 | 3.5 [2.3;5.3]              | 6.9 [2.9;16.4]              | 1.5 [0.9;2.7]              | 3.8 [1.5;9.8]               | 15.0 [2.3;99.6]            | 12.0 [0.6;242.8]            |
| >30                                                                                   | 4.5 [3.6;5.6]              | 13.9 [8.3;23.2]             | 2.8 [2.2;3.5]              | 8.9 [5.1;15.4]              | 10.0 [1.3;78.1]            | 20.0 [1.2;339.5]            |
| <b>Positive Likelihood Ratio by stage group, NSCLC only</b>                           |                            |                             |                            |                             |                            |                             |
| Early stages (I,II & IIIA)                                                            | 3.4 [2.6;4.5]              | 9.5 [5.8;15.7]              | 2.4 [1.9;3.0]              | 7.4 [4.3;12.6]              | 10.6 [1.6;71.8]            | 16.0 [1.0;251.8]            |
| Advanced stages (IIIB, IIIC, IV, IVA)                                                 | 4.3 [3.4;5.5]              | 14.3 [8.9;23.0]             | 2.5 [1.9;3.1]              | 8.1 [4.7;13.8]              | 15.0 [2.3;99.6]            | 25.1 [1.6;395.5]            |
| <b>Positive Likelihood Ratio by SCLC stage</b>                                        |                            |                             |                            |                             |                            |                             |
| Extensive                                                                             | 4.5 [3.6;5.6]              | 15.6 [9.8;24.7]             | 2.8 [2.2;3.5]              | 9.5 [5.4;16.6]              |                            |                             |
| Limited                                                                               | 4.5 [3.6;5.6]              | 10.4 [4.1;26.2]             | 2.8 [2.2;3.5]              | 10.5 [6.3;17.7]             |                            |                             |

For all tumor characteristics, only Positive Likelihood Ratio [95% CI] is presented. The denominator for these PLRs is the overall (1-specificity) of each set.

\* Positive Likelihood Ratio was adjusted as sensitivity was 100%

\*\* Positive Likelihood Ratio was adjusted as sensitivity was
