# Supplementary material
Source: HighWire-hosted journal article supplement (https://erj.ersjournals.com/content/57/1/2002682)
Supplement: inline-supplementary-material-2 [file inline-supplementary-material-2.pdf]

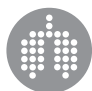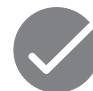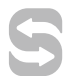

SHAREABLE PDF

# Validation of Lung EpiCheck, a novel methylation-based blood assay, for the detection of lung cancer in European and Chinese high-risk individuals

Mina Gaga <sup>1</sup>, Joanna Chorostowska-Wynimko <sup>2</sup>, Ildikó Horváth <sup>3</sup>, Martin C. Tammemagi <sup>4</sup>, David Shitrit <sup>5</sup>, Vered H. Eisenberg <sup>6</sup>, Hao Liang <sup>7</sup>, David Stav <sup>8</sup>, Dan Levy Faber <sup>9,10</sup>, Maarten Jansen <sup>11</sup>, Yael Raviv <sup>12</sup>, Vasileios Panagoulas <sup>13</sup>, Piotr Rudzinski <sup>2</sup>, Gabriel Izibicki <sup>14</sup>, Ohad Ronen <sup>15</sup>, Adiv Goldhaber <sup>16</sup>, Rawia Moalem <sup>17</sup>, Nadir Arber <sup>18</sup>, Ilana Haas <sup>19</sup> and Qinghua Zhou <sup>7</sup>

**Affiliations:** <sup>1</sup>7th Respiratory Medicine Dept, Athens Chest Hospital, Athens, Greece. <sup>2</sup>National Institute of Tuberculosis and Lung Diseases, Warsaw, Poland. <sup>3</sup>National Korányi Institute of Pulmonology, Budapest, Hungary. <sup>4</sup>Brock University, St Catharines, ON, Canada. <sup>5</sup>Pulmonary Dept, Meir Medical Center, Kfar Saba, Israel. <sup>6</sup>Sackler Faculty of Medicine, Tel Aviv University, Tel Aviv, Israel. <sup>7</sup>Lung Cancer Center/Lung Cancer Institute, West China Hospital, Sichuan University, Chengdu, China. <sup>8</sup>Lung Institute, Maccabi Health Services Hashalom, Tel-Aviv, Israel. <sup>9</sup>Dept of Cardiothoracic Surgery, Lady Davis Carmel Medical Center, Haifa, Israel. <sup>10</sup>Ruth and Bruce Rappaport Faculty of Medicine, Technion – Israel Institute of Technology, Haifa, Israel. <sup>11</sup>Pulmonary Dept, Ziekenhuisgroep Twente, Hengelo, The Netherlands. <sup>12</sup>Dept of Medicine, Pulmonology Institute, Soroka Medical Center, Ben-Gurion University, Beer-Sheva, Israel. <sup>13</sup>2nd Respiratory Medicine Dept, Athens Chest Hospital, Athens, Greece. <sup>14</sup>Pulmonary Institute, Shaare Zedek Medical Center, Jerusalem, Israel. <sup>15</sup>Dept of Otolaryngology – Head and Neck Surgery, Galilee Medical Center affiliated with Azrieli Faculty of Medicine, Safed, Israel. <sup>16</sup>Clalit Health Services, Raanana, Israel. <sup>17</sup>Gastroenterology Institute, The Holy Family Hospital, Nazareth, Israel. <sup>18</sup>Integrated Cancer Prevention Center, Tel Aviv Sourasky Medical Centre, Sackler Faculty of Medicine, Tel Aviv University, Tel-Aviv, Israel. <sup>19</sup>Breast Unit, Meir Medical Center, Kfar Saba, Israel.

**Correspondence:** Mina Gaga, 7th Resp. Med. Dept and Asthma Center, 152 Mesogion Ave Athens 11527, Greece. E-mail: minagaga@yahoo.com

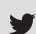

@ERSpublications

**Lung EpiCheck, a simple blood test, detected 85% of early-stage lung cancers with specificity of 64% in high-risk population, reaching AUC of 0.942 when combined with risk factors. This could improve efficiency of implementing lung cancer screening.** <https://bit.ly/3jWhLON>

**Cite this article as:** Gaga M, Chorostowska-Wynimko J, Horváth I, *et al.* Validation of Lung EpiCheck, a novel methylation-based blood assay, for the detection of lung cancer in European and Chinese high-risk individuals. *Eur Respir J* 2021; 57: 2002682 [<https://doi.org/10.1183/13993003.02682-2020>].

This single-page version can be shared freely online.

## ABSTRACT

**Aim:** Lung cancer screening reduces mortality. We aim to validate the performance of Lung EpiCheck, a six-marker panel methylation-based plasma test, in the detection of lung cancer in European and Chinese samples.

**Methods:** A case-control European training set (n=102 lung cancer cases, n=265 controls) was used to define the panel and algorithm. Two cut-offs were selected, low cut-off (LCO) for high sensitivity and high cut-off (HCO) for high specificity. The performance was validated in case-control European and Chinese validation sets (cases/controls 179/137 and 30/15, respectively).

**Results:** The European and Chinese validation sets achieved AUCs of 0.882 and 0.899, respectively. The

sensitivities/specificities with LCO were 87.2%/64.2% and 76.7%/93.3%, and with HCO they were 74.3%/90.5% and 56.7%/100.0%, respectively. Stage I nonsmall cell lung cancer (NSCLC) sensitivity in European and Chinese samples with LCO was 78.4% and 70.0% and with HCO was 62.2% and 30.0%, respectively. Small cell lung cancer (SCLC) was represented only in the European set and sensitivities with LCO and HCO were 100.0% and 93.3%, respectively. In multivariable analyses of the European validation set, the assay's ability to predict lung cancer was independent of established risk factors (age, smoking, COPD), and overall AUC was 0.942.

**Conclusions:** Lung EpiCheck demonstrated strong performance in lung cancer prediction in case-control European and Chinese samples, detecting high proportions of early-stage NSCLC and SCLC and significantly improving predictive accuracy when added to established risk factors. Prospective studies are required to confirm these findings. Utilising such a simple and inexpensive blood test has the potential to improve compliance and broaden access to screening for at-risk populations.
